# Supplementary material for: A stress relaxation strategy for preparing high-quality organic–inorganic perovskite thin films via a vapor–solid reaction
Source: Royal Society of Chemistry journal article supplement (doi:10.1039/d3ta04666d), 2023-01-01
Supplement: d3ta04666d1.pdf [file d3ta04666d1.pdf]

## A stress relaxation strategy for preparing high-quality organic-inorganic perovskite thin films via vapor-solid reaction

Shenghan Hu<sup>a</sup>, Changyu Duan<sup>a</sup>, Hongqiang Du<sup>a</sup>, Shuang Zeng<sup>a</sup>, Anqi Kong<sup>a</sup>,

Yuanyuan Chen<sup>a</sup>, Yong Peng<sup>a</sup>, Yi-Bing Cheng<sup>a,b</sup> and Zhiliang Ku<sup>\*a</sup>

<sup>a</sup>State Key Lab of Advanced Technologies for Materials Synthesis and Processing, Wuhan University of Technology, 122 Luoshi Road, Wuhan 430070, Hubei Province, China

<sup>b</sup>Foshan Xianhu Laboratory of the Advanced Energy Science and Technology Guangdong Laboratory, Foshan 528216, Guangdong Province, China

\* Corresponding author: Zhiliang Ku, E-mail: [zhiliang.ku@whut.edu.cn](mailto:zhiliang.ku@whut.edu.cn)

Keywords: Stress relaxation; thin film; Vapor-solid reaction; Perovskite; Solar cell

### Materials:

All the reagents and chemicals were used as received without further treatment. Formamidinium iodide (FAI,99%), Formamidinium Chloride (FACl,99%) were purchased from Suzhou Xurou Optoelectronics Technology Corp). Methylammonium iodide (MAI,99%), Propylammonium Iodide (PAI,99%), Butylamine iodide (BAI,99%), Hexaneammonium iodide (HAI,99%) Cesium bromide (CsBr,99%), lead iodide (PbI<sub>2</sub>,99.99%), Li-TFSI, FK209, 4-tert-butylpyridine (TBP) and PCBM were purchased from Xi'an Polymer Light Technology Corp. Anhydrous ethanol (99.7%) and Tin (II) chloride dihydrate (SnCl<sub>2</sub> · 2H<sub>2</sub>O) was purchased from Sigma-Aldrich. Other materials were purchased from Shanghai Aladdin Biochemical Technology Co. and Sinopharm Chemical Reagent Co. LTD used as received.

### Device fabrication

Preparation of FTO/SnO<sub>x</sub> substrates:

The etched FTO glass was placed in a cleaning container and sonicated with detergent, deionized water, and anhydrous ethanol for 15 minutes in sequence. The SnO<sub>x</sub> precursor was prepared by mixing 1.096g of SnCl<sub>2</sub>·2H<sub>2</sub>O, 5g of urea, 5mL of hydrochloric acid, 100μL of thioglycolic acid per 400mL of deionized water, then stored in a refrigerator below 5°C for use. The FTO/SnO<sub>x</sub> substrates were prepared by chemical bath deposition (CBD) approach as follows: firstly, immerse the pre-cleaned

FTO glass in a SnO<sub>x</sub> precursor solution for 3h at 90 °C; secondly, FTO/ SnO<sub>x</sub> substrates were sonicated with deionized water for about five minutes and flushed with deionized water three times, then dried quickly by an air gun. Finally, the dried FTO/ SnO<sub>2</sub> substrates are annealed on a 170°C hot plate for one hour.

### **Preparation of perovskite films**

Deposition of CsBr/PbI<sub>2</sub> composite precursor film: CsBr (around 0.3-0.5 Å/s rate, 30 nm) and PbI<sub>2</sub> (around 3-5 Å/s rate, 300 nm) were depositions through thermal evaporation on the FTO/SnO<sub>x</sub> substrates under 8×10<sup>-6</sup> bar without annealing substrates.

Preparation of organic vapor source: FAI/FACl hybrid vapor source were deposited on glass substrates by ultrasonic spraying 20 mL FAI ethanol solution containing 500 mg FAI and 50 mg FACl.

Solid-vapor reaction: the composite precursor film and organic vapor source were placed in a self-designed vacuum chamber with (170 °C, 30 Pa) for a three minutes solid-vapor reaction to form control perovskite films. Then perovskite films which need annealing were put in a chamber at the corresponding temperature of the atmospheric environment for 15 minutes. Perovskite films which need vapor annealing were put in the same chamber at the 170 °C of the atmospheric environment and passed into the corresponding organic vapor.

The sample status explanation appealing in article. **Control sample:** perovskite film after three minutes of solid-vapor reaction. **Annealing sample:** perovskite film after three minutes of solid-vapor reaction and then annealed at 170 °C on a hot plate. **Vapor-annealing sample:** perovskite film after three minutes of solid-vapor reaction and then annealed 170 °C of the atmospheric environment and passed into the PAI vapor.

### **Preparation of Spiro-OMeTAD films and Au electrode**

The Spiro-OMeTAD solution was prepared by dissolving 91.4 mg Spiro-OMeTAD into 1 mL chlorobenzene followed by the adding 18 μL Li-TFSI (pre-dissolved as a 520 mg/mL stock solution in acetonitrile), 11.4 μL FK209 (pre-dissolved

as a 300 mg/mL stock solution in acetonitrile) and 35.5  $\mu$ L 4-tert-butylpyridine in the solution. Spiro-OMeTAD films were deposited by spin-coating at 4000 rpm for 20 s in N<sub>2</sub>-filled glovebox. Finally, 80 nm thick gold was thermally evaporated on top of the Spiro-OMeTAD films as the back contact. In the end, an Au electrode (80 nm) was thermally evaporated onto the Spiro-OMeTAD film under a pressure of  $6 \times 10^{-4}$  Pa.

## Characterization

The surface morphologies were investigated by scanning electron microscopy (SEM S-4800, Hitachi) with an accelerating voltage of 5 kV. Atomic Force Microscopy (AFM) topography images were acquired on (Asylum Research, Oxford Instruments). The X-ray diffraction (XRD) patterns of the samples and residual stress test were recorded using an X-ray diffractometer (XRD, D8 Advance) and analyzed by jade 6.5 software. The grazing incidence X-ray diffraction (GIXRD) measurements were characterized using a PANalytical Empyrean diffractometer. Grazing incidence wide-angle X-ray scattering (GIWAXS) was obtained by (Dectris EIGER2 Si 1M). The UV-vis absorption spectra were measured by a UV-vis spectrometer (Lambda 750S, PerkinElmer). The photoluminescence (PL) and time-resolved photoluminescence (TRPL) spectra were obtained from Delta Flex Flux Fluorescence Lifetime System (HORIBA Scientific Company, Japan). The fluorescence lifetime imaging (FLIM) was observed by Time-resolved fluorescence confocal microscopy and spectral testing system (PicoQuant Micro Time100). The chemical compositions of the samples were carried out using X-ray photoelectron spectroscopy (XPS) (EscaLab Xi+, Thermo Scientific) equipped with a monochromatic Al K $\alpha$  X-ray source ( $h\nu = 1486.6$  eV). TAS was performed with a HELIOS femtosecond transient absorption (Ultrafast System, LLC). The 400 nm pump pulses were generated by a 1 kHz, 85 fs Ti: sapphire ultrafast laser amplifier under pump power of 2  $\mu$ W. The photocurrent density-voltage (J-V) characteristics of solar cells were measured under AM 1.5G illumination at 100 mW/cm<sup>2</sup> (Oriel 94023A, 300 W) and a Keithley 2400 source meter. All the devices

were tested under AM 1.5G sunlight ( $100\text{mW cm}^{-2}$ ) using a metal mask of  $0.1475\text{ cm}^2$  with a scan rate of  $10\text{ mV/s}$ . Quasi-stabilized power output (q-SPO) was recorded for  $120\text{ s}$  at the potential corresponding to the maximum power point in the reverse J-V curve. The external quantum efficiency (EQE) was measured by an EQE system (in Newport, USA PT-QEM1000) which has been calibrated by Newport and EQE data was measured from  $280\text{ nm}$  to  $850\text{ nm}$  with an interval of  $10\text{ nm}$ . Space charge limited current (SCLC), Electrical impedance spectroscopy (EIS) and Mott-Schottky analyses were measured by a Chenhua electrochemistry workstation under dark conditions.

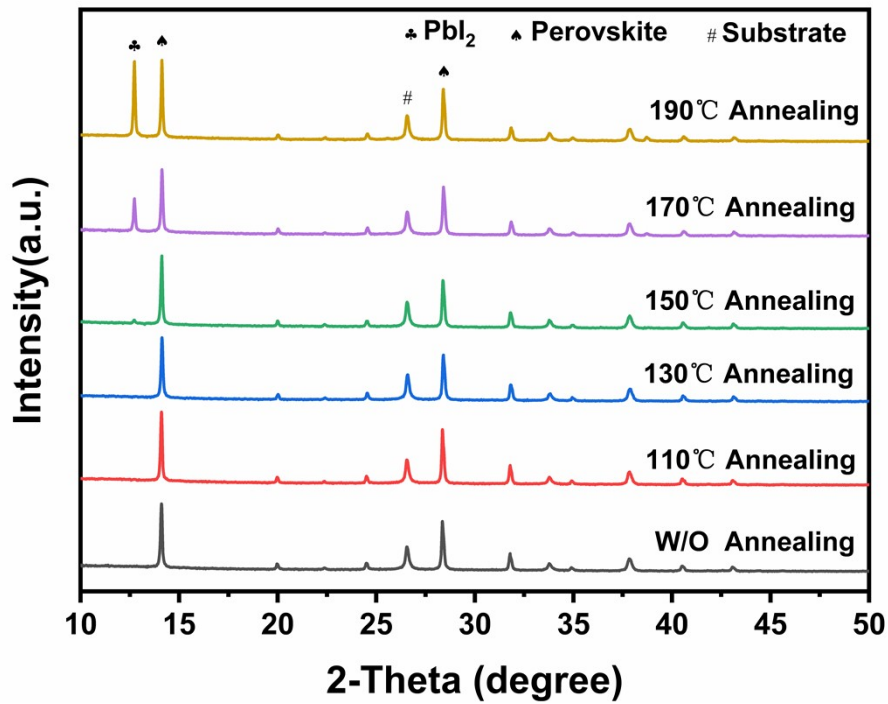

**Figure S1.** XRD patterns of the perovskite thin films with different annealing temperatures.

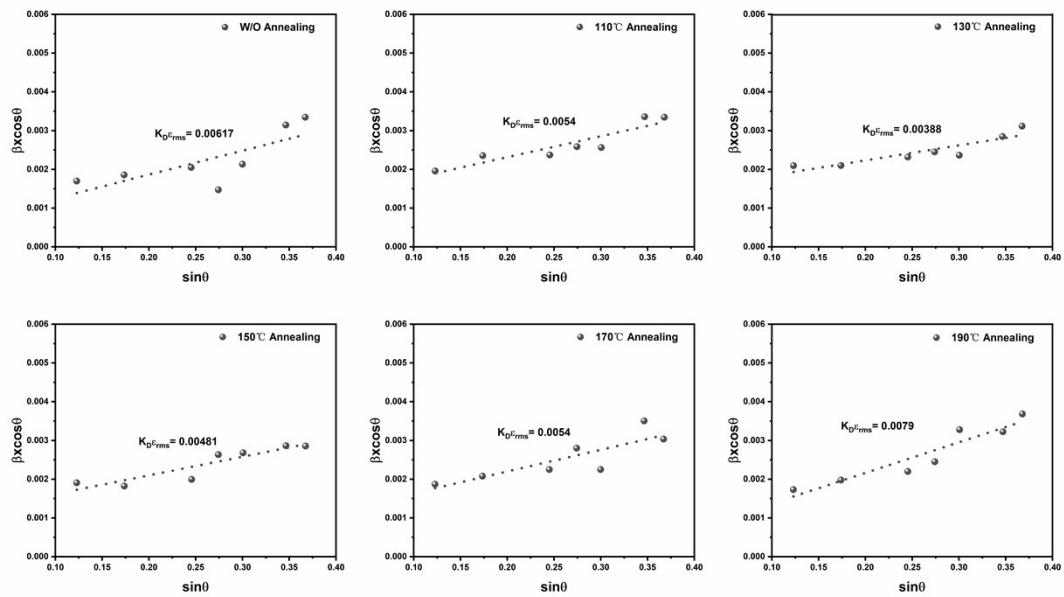

**Figure S2.** Williamson–Hall plots of perovskite films W/O and with different annealing temperatures.

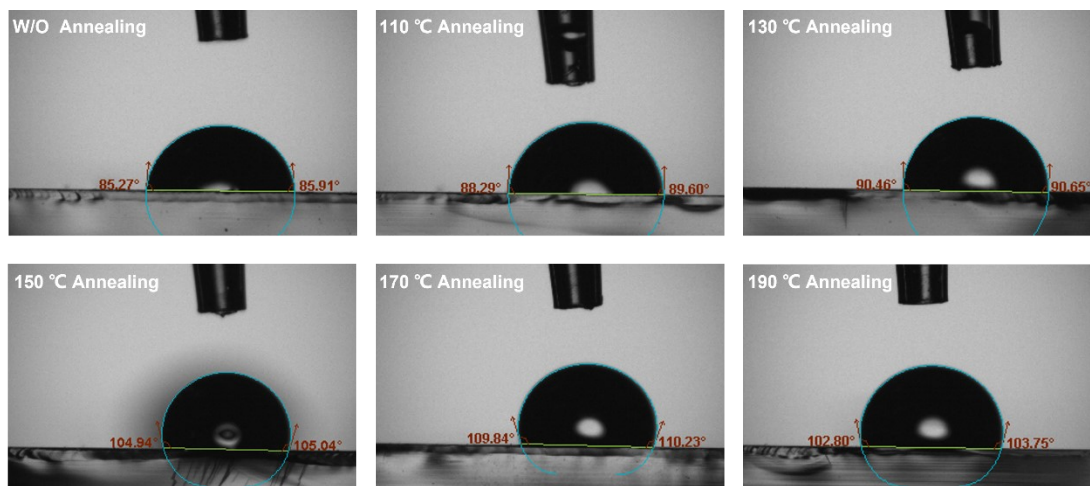

**Figure S3.** Contact angles of perovskite films W/O and with different annealing temperatures.

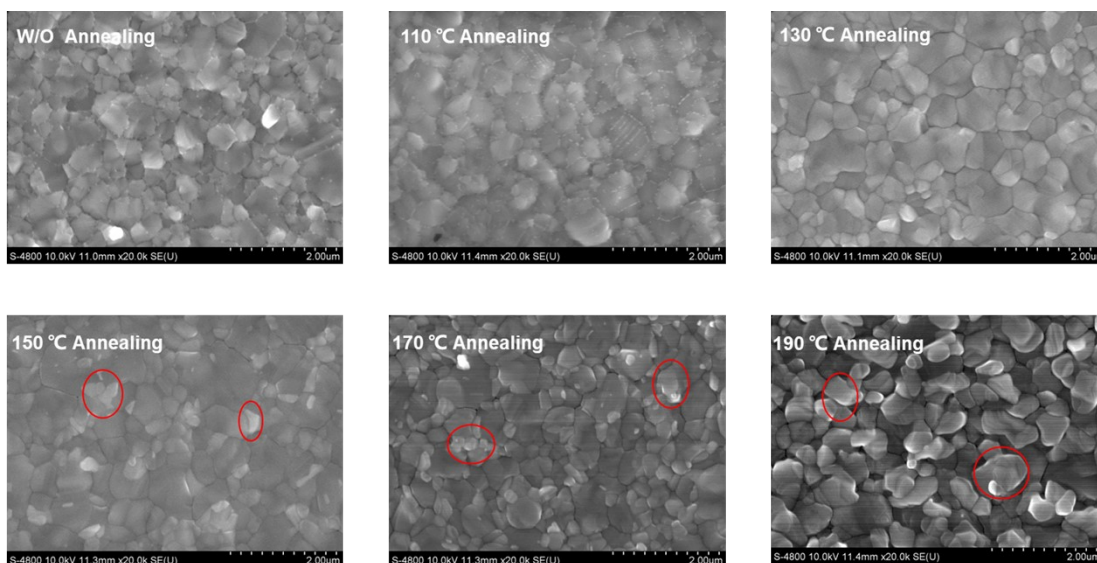

**Figure S4.** Top-view SEM images of perovskite films W/O and with different annealing temperatures.

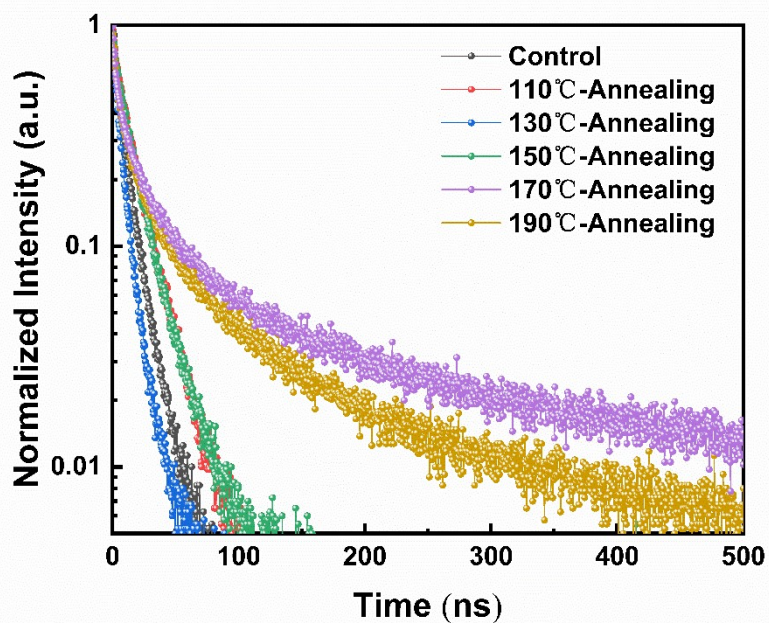

**Figure S5.** TRPL spectra of perovskite films W/O and with different annealing temperatures.

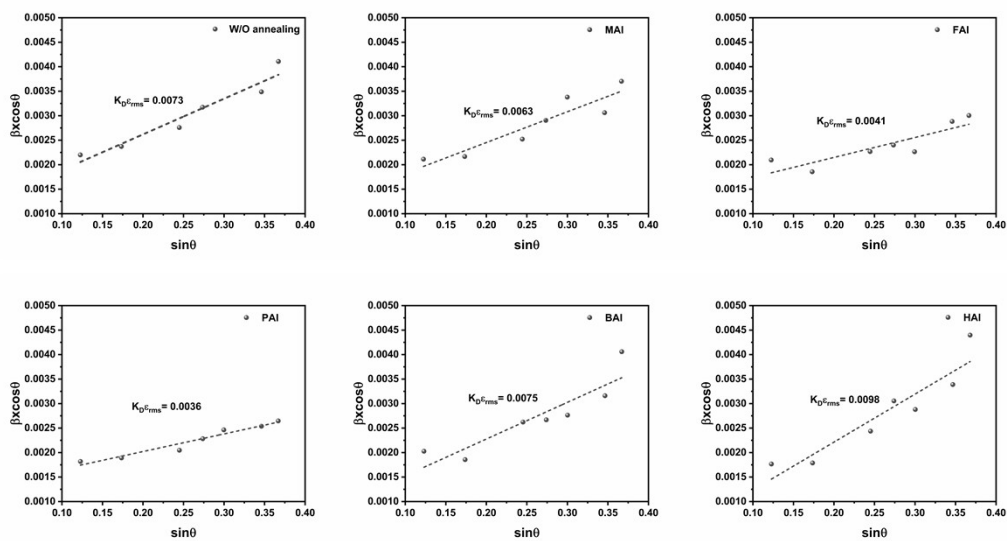

**Figure S6.** Williamson–Hall plots of perovskite films W/O and with Vapor-annealing of different organic ammonium salts.

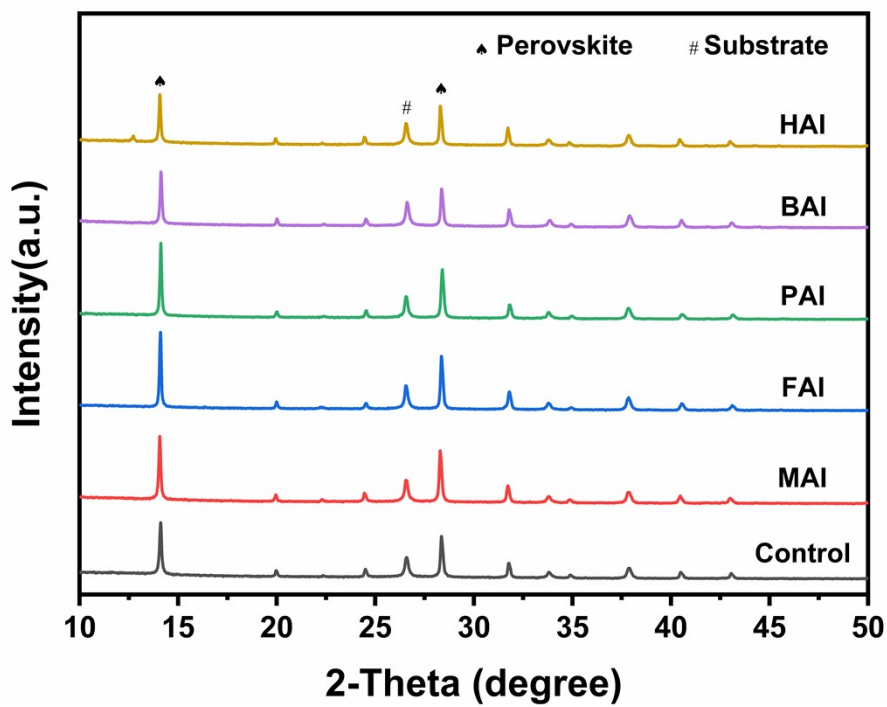

**Figure S7.** XRD patterns of the perovskite thin films W/O annealing and with different vapor annealing.



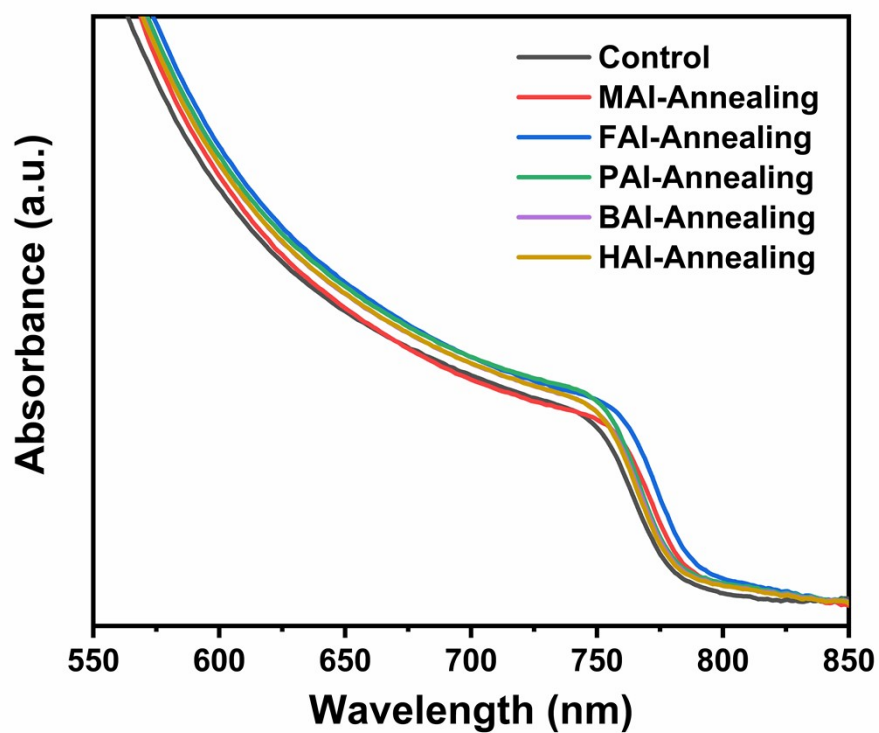

**Figure S8.** UV-vis absorption plots of the perovskite thin films W/O annealing and with different vapor annealing.

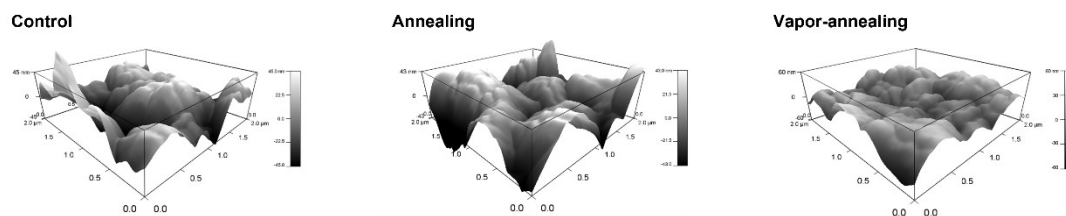

**Figure S9.** The AFM 3D topography images of perovskite films with Control, annealing and vapor annealing.



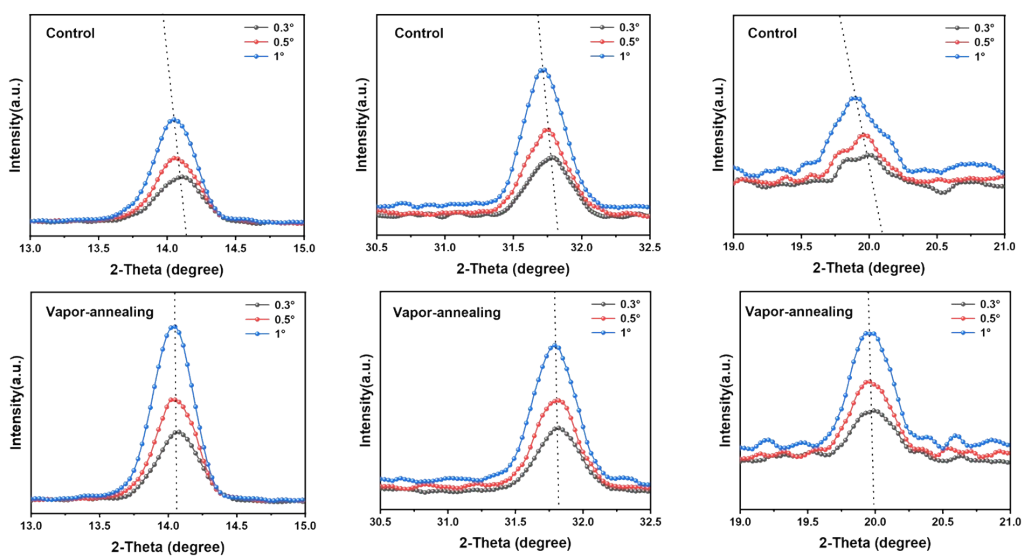

**Figure S10.** Different grazing incidence angles GIXRD patterns of the perovskite thin films W/O annealing and with vapor annealing.

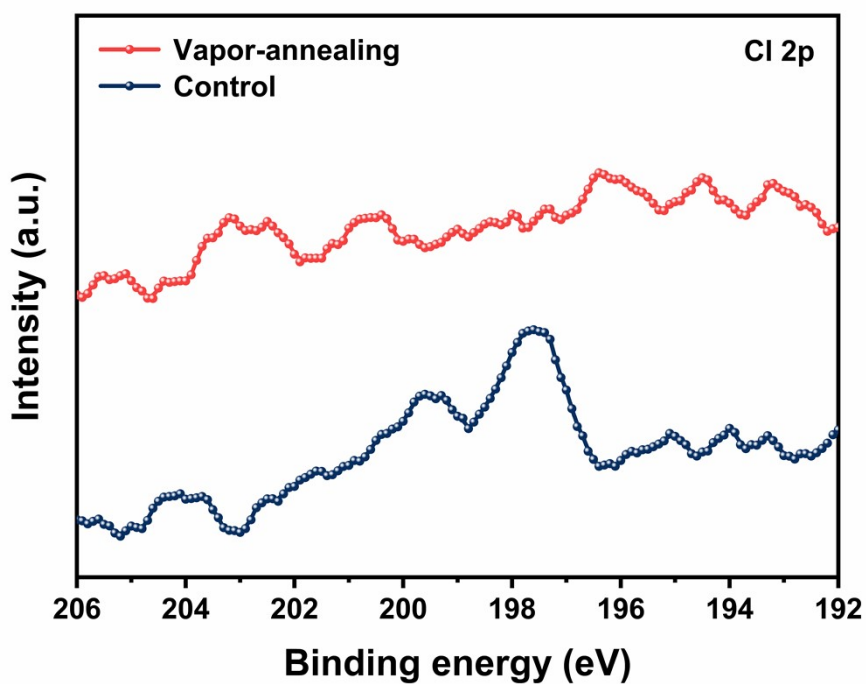

**Figure S11.** XPS spectra of the Cl 2p signal in the perovskite thin film W/O annealing and with vapor annealing.

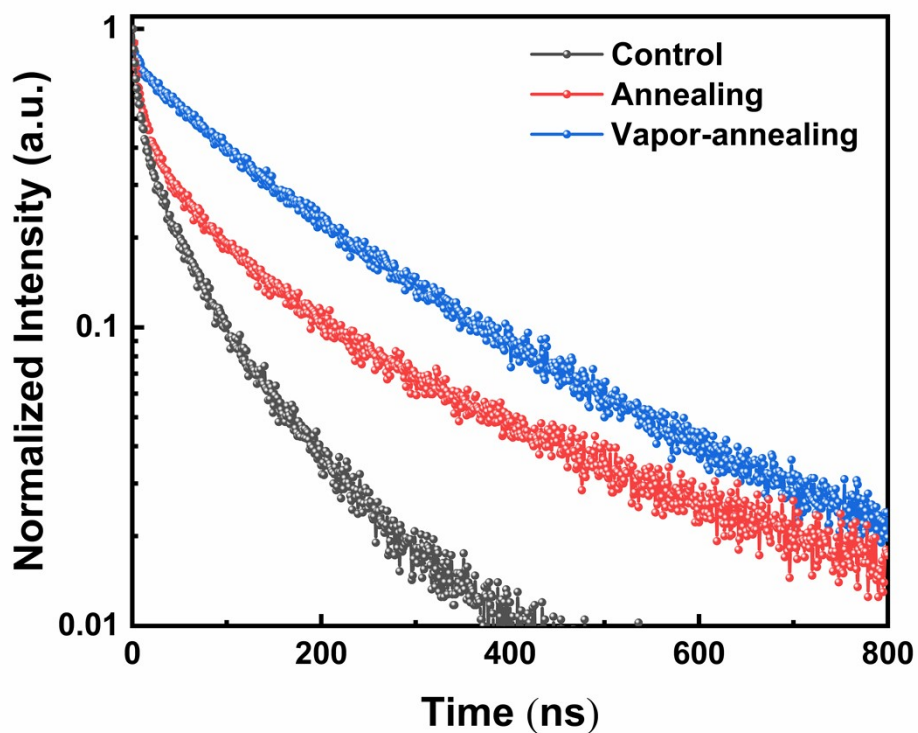

**Figure S12.** TRPL spectra of perovskite films W/O annealing, with annealing and with vapor annealing.

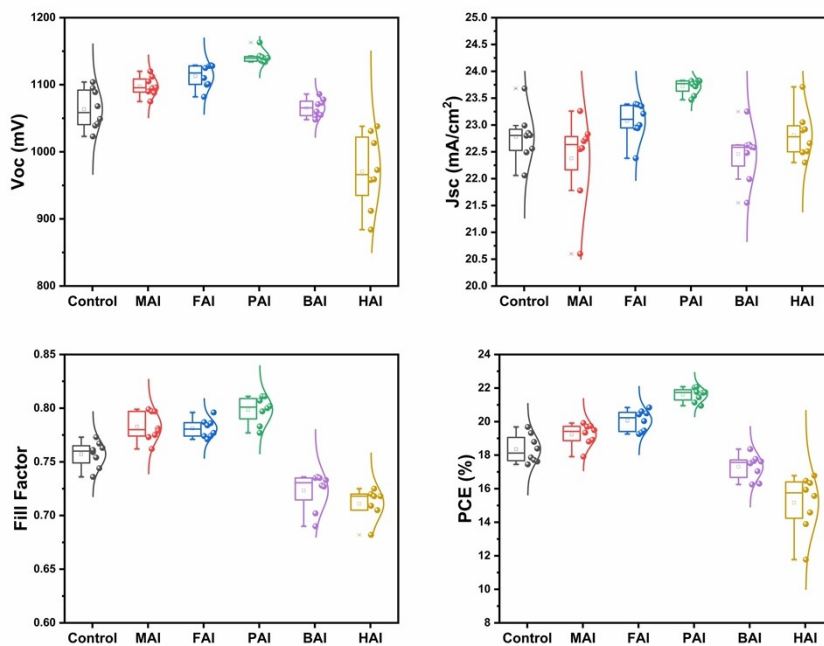

**Figure S13.** Statistical distribution diagram of the  $V_{oc}$ ,  $J_{sc}$ , FF, PCE of PSCs fabricated

by annealing in different ammonium salt vapors.

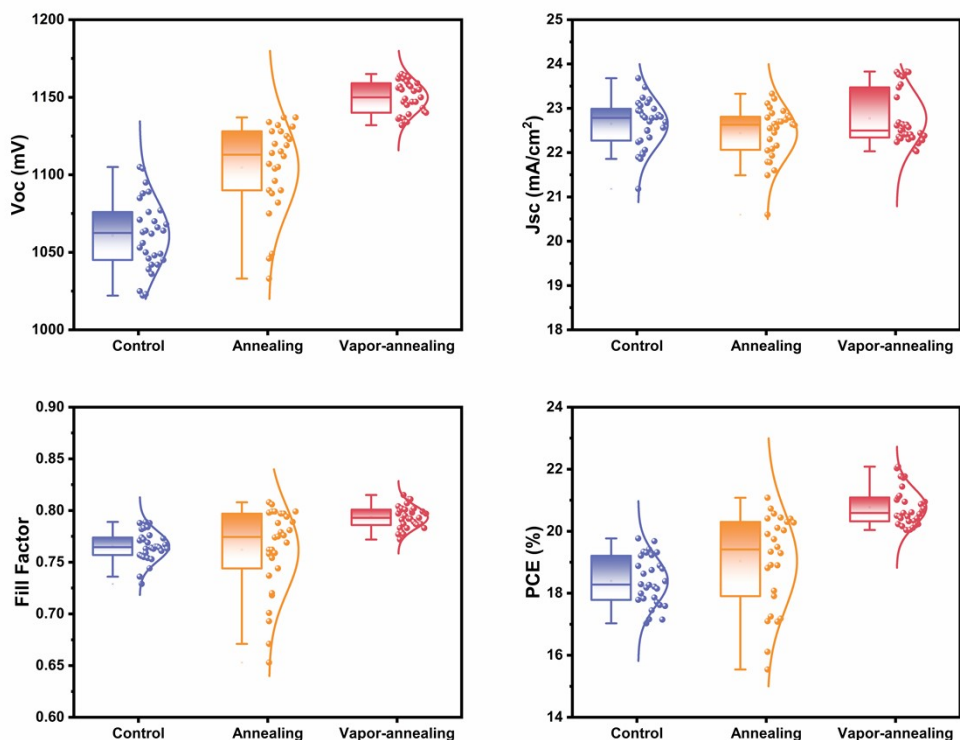

**Figure S14.** Statistical distribution diagram of the Voc, Jsc, FF, PCE of PSCs fabricated by Control, annealing and vapor annealing.

**Table S1.** Biexponential fitted TRPL parameters of the Control, Annealing and Vapor-annealing

| Samples         | $A_1$ | $\tau_1$ (ns) | $A_2$ | $\tau_2$ (ns) | $\tau_{avg}$ (ns) |
|-----------------|-------|---------------|-------|---------------|-------------------|
| Control         | 0.374 | 13.48         | 0.180 | 125.83        | 105.31            |
| Annealing       | 0.337 | 26.07         | 0.290 | 174.8         | 152.83            |
| Vapor-annealing | 0.458 | 120.72        | 0.268 | 290.80        | 220.21            |

**Table S2** EIS Fitting parameters of solar cells based on Control and Vapor-annealing modified devices. The series resistance ( $R_s$ ) and charge composite resistance ( $R_{rec}$ ) can be obtained by data fitting of equivalent circuit diagram of PSCs by EC-Lab software.

---

| <b>Sample</b>   | <b><math>R_s</math> (<math>\Omega</math>)</b> | <b><math>R_{rec}</math> (<math>\Omega</math>)</b> |
|-----------------|-----------------------------------------------|---------------------------------------------------|
| Control         | 9.544                                         | 20075.9                                           |
| Vapor-annealing | 9.012                                         | 41646.6                                           |

---
